# Supplementary material for: #moralischverletzt – Berufsethische Ansprüche und die Artikulation kollektiver Ungerechtigkeitserfahrungen von Pflegekräften während der Coronapandemie
Source: publisher site journal article supplement (doi:10.1515/zfsoz-2025-2005), 2025-02-01
Supplement: Supplementary file 1 [file Abramowski_Hilmar_Online-Anhang_final.pdf › Abramowski_Hilmar_Online-Anhang_final.pdf]

# **#moralischverletzt – Berufsethische Ansprüche und die Artikulation kollektiver Ungerechtigkeitserfahrungen von Pflegekräften während der Coronapandemie**

#morally injured - professional ethical demands and the articulation of care workers' collective experiences of injustice during the corona pandemic

## **Online-Anhang / Online Appendix**

**Ruth Abramowski**

Universität Bremen, SOCIUM Forschungszentrum Ungleichheit und Sozialpolitik, Mary-Somerville-Straße 5, D-28359 Bremen, Germany; ruth.abramowski@uni-bremen.de

**Till Hilmar**

Universität Wien, Institut für Soziologie, Rooseveltplatz 2, A-1090 Wien, Austria; till.hilmar@univie.ac.at

## **Inhalt**

**Herausforderungen der Qualität von Twitter Daten**

**Download, Korpus-Preprocessing, Muster-Erkennung**

**Konversations-Tweets**

**Berufsbezeichnungen in Nutzer:innen-Kurzbeschreibungen**

**Kodes**

**Literatur**

## Herausforderungen der Qualität von Twitter Daten

Mittlerweile macht die Nutzung von sozialen Medien wie Twitter einen wesentlichen Teil der alltäglichen Interaktion zahlreicher Individuen aus, woraus sich ein riesiger Datenpool für die empirische Sozialforschung ergibt (Mayerl & Faas 2022: 1321). Auch die sozialwissenschaftliche Anwendung dieser ‚Big-Data‘ ist inzwischen keine Seltenheit mehr. Eine Vielzahl an Studien aus Disziplinen wie der Soziologie, der Kommunikationswissenschaft, der Politikwissenschaft, der Informatik oder der Geografie greift auf Twitter-Daten zurück (Pfaffenberger 2018: 53, 55). Twitter-Daten werden beispielsweise für soziopolitische Themen, die politische Soziologie, Verschwörungstheorien, Kriminologie oder für die Wellbeing-Forschung ausgewertet (Mayerl & Faas 2022: 1323f.). Doch ist die wissenschaftliche Analyse von Twitter-Daten nicht nur mit Vorteilen, sondern auch mit einigen Herausforderungen verbunden (Mayerl & Faas 2022: 1329–1331; Pfaffenberger 2018):

- So können Twitter-Nutzer:innen mehrere Profile anlegen und sich dadurch mehrfach mit unterschiedlichem Namen an den Diskursen beteiligen.
- Hinterfragbar ist auch, inwieweit menschliche Akteur:innen oder ‚Social Bots‘ an den Diskussionen teilnehmen. In unserer Analyse haben wir Duplikate und Retweets entfernt und damit das Risiko, automatisiert erstellte Inhalte auszuwerten und stärker zu gewichten, minimiert.
- Coverage-Fehler der Twitter-Daten bergen die Problematik, dass sich die Zielpopulation von den Twitter-Nutzer:innen unterscheiden kann.
- Fehlerquellen können auch bei der Extraktion relevanter Informationen auftreten, was bedeutet, dass entweder wichtige Schlagworte in den Daten fehlen oder es werden unwichtige Tweets in die Analyse eingebunden bzw. wichtige Tweets ausgeschlossen. Dieses Risiko konnten wir in unserem Ansatz durch das stichprobenartige Einbeziehen von Konversations-Tweets minimieren (siehe unten).
- Tweets, die gelöscht wurden (sowie User:innen Accounts, die gelöscht wurden, und damit sämtliche ihrer Tweets) sind zum jeweiligen Zeitpunkt des Downloads der Daten nicht mehr verfügbar. Insofern ist die Datenverfügbarkeit im Hinblick auf die Zeitspanne und das Volumen immer begrenzt (siehe auch Shugars et al. 2021).
- Häufig kann die Grundgesamtheit von Twitter-Daten nicht oder nur sehr vage bestimmt werden, sodass die Daten nicht repräsentativ sind, weshalb inferenzstatistische Schlüsse vermieden werden sollten. Die von uns gewählte methodische Kombination, die eine qualitative Analyse auf der Grundlage relevanter statistischer Muster in den Daten vornimmt und insgesamt interpretativ orientiert ist, trägt diesem Umstand Rechnung.
- Je nach Kodiervorgang können Interpretationsfehler auftreten, wobei die Interpretationsfähigkeit auch durch die Eigenheit der Internetsprache erschwert ist.
- Wesentlich ist außerdem die Reliabilität manueller Kodierungen, die jedoch über Verfahren der Inter- und Intrakoderreliabilität sowie der Interkoder:innen-Konsistenz (O'Connor & Joffe 2020) überprüft werden kann.

- Durch die Analyse von Social-Media-Daten ergeben sich nicht zuletzt ethische Herausforderungen des Datenschutzes, da mittels Algorithmen die De-Anonymisierung von Daten und die Verknüpfung mit anderen Datenquellen zumindest denkbar ist.

Festzuhalten ist, dass die Analyse von Social-Media-Daten zwar mit einigen Herausforderungen verbunden ist, zugleich jedoch diese Art der ‚Big Data‘ das „große, zukunftsweisende Potenzial einer modernen empirischen Sozialforschung“ (Mayerl & Faas 2022: 1331) bietet und es in erster Linie von der inhaltlichen Forschungsfrage abhängig ist, inwieweit die Nutzer:innen-generierten Twitter-Daten für die jeweilige Studie geeignet sind (Mayerl & Faas 2002: 1331). Vor dem Hintergrund unseres Forschungsanliegens, moralische Verletzungen nicht nur aus einer soziologischen Perspektive theoretisch zu fassen, sondern auch die empirischen kollektiv-empfundene Wertekonflikte des Pflegepersonals wissenschaftlich zu analysieren, sehen wir einen fundamentalen Mehrwert in der Analyse der Twitter-Daten. So haben zahlreiche Pflegekräfte Twitter als Plattform genutzt, um unter dem Hashtag „moralisch verletzt“ ihre subjektiv empfundenen moralischen Verletzungen zu teilen und zu beschreiben, wie sich diese in ihrem Alltag äußern.

## Download, Korpus-Preprocessing, Muster-Erkennung

Die Daten (Inhalte der Tweets sowie alle verfügbaren Metadaten, inklusive User:innen-Account-Daten) zu den drei Keywords „moralischverletzt“, „moralisch verletzt“ sowie „moralische Verletzung“ zwischen dem 04. Mai 2021 und dem 29. Dezember 2022 wurden am 13. Februar 2023 heruntergeladen.<sup>1</sup>

Der Download, die Aufbereitung und Reinigung der Daten erfolgte im Programm R, insbesondere mit Rückgriff auf die packages *academictwitterR* (Barrie & Ho 2021) und *quanteda* (Benoit et al. 2018). Retweets wurden entfernt. Symbole, Stopwords, Zahlen, Satzzeichen und URLs wurden im Haupt-Korpus nicht entfernt, da dies eine umfassende qualitative Inhaltsanalyse verkomplizieren oder verunmöglichen würde (Grimmer et al. 2022). Als Teil der Muster-Erkennung in unseren Daten lassen sich neben dem Zeitverlauf (Grafik 1 im Manuskript) auch andere Häufigkeiten betrachten. So lassen sich beispielsweise die am häufigsten verwendeten Hashtags untersuchen (auf der Basis eines Sub-Korpus, in dem Symbole, Stopwords, Zahlen, Satzzeichen und URLs entfernt wurden) (Benoit et al. 2018). Tabelle A1 listet diese auf. Diese Übersicht unterstreicht die herausragende Rolle, die den medizinischen Pflegeberufen in dieser Twitter-Debatte gegenüber anderen Berufen zukommt.

**Tabelle A1:** Liste der am häufigsten verwendeten Hashtags

| feature                    | frequency | rank | docfreq |
|----------------------------|-----------|------|---------|
| #moralischverletzt         | 1244      | 1    | 1239    |
| #DeutschlandWerPfleegtDich | 92        | 2    | 92      |
| #MoralischVerletzt         | 69        | 3    | 69      |
| #Pflege                    | 66        | 4    | 66      |
| #Pflegenotstand            | 53        | 5    | 53      |

<sup>1</sup> Der Code für unsere empirische Analyse ist öffentlich verfügbar unter: [https://github.com/tillhilmar/moralisch\\_verletzt](https://github.com/tillhilmar/moralisch_verletzt)

|                              |    |    |    |
|------------------------------|----|----|----|
| #pflegeteuchdochselbst       | 33 | 6  | 33 |
| #Pflexit                     | 29 | 7  | 29 |
| #DeutschlandWerVersorgtDich  | 28 | 8  | 28 |
| #armut                       | 27 | 9  | 27 |
| #SichereBildung              | 23 | 10 | 23 |
| #Deutschlandwerpflegtdich    | 23 | 10 | 23 |
| #Impfzwang                   | 21 | 12 | 21 |
| #schütztendlichauchdiekinder | 20 | 13 | 20 |
| #nichtselbstverständlich     | 20 | 13 | 20 |
| #pflexit                     | 18 | 15 | 18 |
| #nichtselbstverstaendlich    | 18 | 15 | 18 |
| #Pflegestreik                | 18 | 15 | 18 |
| #moralinjury                 | 18 | 15 | 18 |
| #Corona                      | 15 | 19 | 15 |
| #Lanz                        | 13 | 20 | 13 |

Anmerkungen: frequency bezieht sich auf die absolute Häufigkeit, docfreq zählt jeden Hashtag pro Tweet nur einmal.

Quelle: Twitter-Daten, eigene Berechnungen.

## Konversations-Tweets

Twitter ist eine diskursive Plattform, auf der sich Diskussionen als Reaktion auf vorangehende Beiträge entspinnen. Innerhalb kürzester Zeit können so bestimmte Konversationslinien entstehen. Wenn Tweets auf der Grundlage von Keywords gesampled werden, so wie wir es auch in unserem Beitrag tun, gehen diese Konversationsdynamiken tendenziell verloren – denn nicht jeder Tweet, der auf einen anderen reagiert, erwähnt selbst notwendigerweise das entscheidende Keyword (in unserem Fall „moralisch verletzt“ und seine Variationen). Um die Dynamik von Konversationen in dieser Forschung zumindest in Einzelfällen berücksichtigen zu können, haben wir ebenfalls alle Tweets heruntergeladen, die sich rund um den Hauptkorpus – also Tweets, in denen jeweils das Keyword zumindest einmal vorkommt – entspinnen (formal gesprochen sind diese Tweets durch eine von Twitter vergebene Zahl, die sogenannte *Conversation\_id*, miteinander verbunden, sobald eine Reaktion – in Form von Quotes oder Replies – zwei Tweets miteinander verbindet. Oft bindet die *Conversation\_id* mehrere Tweets in einer Kette aneinander und die Chronologie der Beiträge lässt sich anhand der genauen Uhrzeit, zu der einzelne Tweets abgeschickt wurden, nachvollziehen). Am 27. Mai 2023 wurden also zusätzlich alle Tweets, die eine *Conversation\_id* mit jenen teilen, die bereits im Hauptkorpus vorlagen, heruntergeladen (ohne Nutzer:innen-Account-Daten). Dieser Datensatz umfasst 38.925 Tweets (darunter auch jene, die in unserem Hauptkorpus vorkommen). Angesichts des Umfangs erscheint uns eine qualitative Analyse dieser Daten unmöglich; stattdessen haben wir uns darauf beschränkt, einige Konversationen, die sich als Reaktion auf unsere als erfahrungsbasiert kodierten Tweets entfacht haben, stichprobenartig zu untersuchen.

Oft finden sich darin emotionale Bestärkung und Anteilnahme (oft auch mittels Emoticons) als Reaktionen auf besonders schockierende oder traurige Schilderungen. Die vorgestellten Erlebnisse werden selten kritisiert oder ihre Ausdrucksform in Frage gestellt; in der Regel finden sich bekräftigende oder ermutigende Antworten. In den Konversationen werden interessanterweise auch die Grenzen dieses Diskurses abgesteckt: So gibt es vereinzelte

Versuche, die Diskussion zu moralischen Verletzungen hier über die Pflege auszuweiten; diese werden allerdings kritisiert oder nicht weiter aufgenommen. Insgesamt findet diese Ausweitung auf andere Berufe in dem von uns analysierten Material nicht statt. Das hat tendenziell mit der Entwicklung von Konversationsdynamiken und einer gezielten Einhegung und Fokussierung des Diskurses auf die Situation von Pflegekräften zu tun.

## Berufsbezeichnungen in Nutzer:innen-Kurzbeschreibungen

Im Manuskript diskutieren wir, welche soziologisch relevanten Informationen über die Nutzer:innen dieser Debatte vorliegen. Wir analysieren die Nutzer:innen-Kurzbeschreibungen („Twitter-Bios“) mittels einem Co-occurrence-Netzwerk (Grafik 2 im Hauptteil des Manuskripts). Daraus wird allerdings nur teilweise ersichtlich, welche Berufsbezeichnungen hier besonders oft genannt werden bzw. eine wichtige Rolle spielen. Um einen vertiefenden Einblick zu dieser Frage zu erlangen, erstellen wir eine Tabelle mit den 150 Begriffen, die am häufigsten in den Nutzer:innen-Kurzbeschreibungen genannt werden (Tabelle A2). Darin finden sich Beschreibungen, die auf berufliche Identitäten schließen lassen: Hier finden sich prominent Begriffe wie „nurse“, „pflege“, „wissenschaft“, „science“, „#pflege“, „krankenschwester“, „student“, „journalist“, „gesundheits-“, „care“, „krankenpfleger“, „autorin“, „engineer“, wodurch die wichtige Rolle der Pflegeberufe für die von uns untersuchte Debatte noch einmal deutlich wird.

Tabelle A2: 150 Begriffe, die am häufigsten in den Nutzer:innen-Kurzbeschreibungen genannt werden

| feature      | frequency | rank | docfreq |
|--------------|-----------|------|---------|
| #noafd       | 87        | 1    | 87      |
| nurse        | 73        | 2    | 71      |
| leben        | 70        | 3    | 62      |
| menschen     | 60        | 4    | 57      |
| privat       | 55        | 5    | 55      |
| politik      | 54        | 6    | 53      |
| immer        | 53        | 7    | 49      |
| #nocovid     | 53        | 7    | 53      |
| mag          | 50        | 9    | 42      |
| mama         | 44        | 10   | 44      |
| love         | 42        | 11   | 39      |
| mutter       | 41        | 12   | 41      |
| #fckafd      | 40        | 13   | 40      |
| liebe        | 40        | 13   | 35      |
| pflege       | 39        | 15   | 37      |
| welt         | 36        | 16   | 35      |
| german       | 36        | 16   | 34      |
| mensch       | 35        | 18   | 35      |
| #notjustsad  | 33        | 19   | 33      |
| tweets       | 33        | 19   | 31      |
| social       | 32        | 21   | 31      |
| #fcknzs      | 31        | 22   | 30      |
| twitter      | 29        | 23   | 29      |
| wissenschaft | 29        | 23   | 29      |

|                   |    |    |    |
|-------------------|----|----|----|
| account           | 29 | 23 | 29 |
| team              | 29 | 23 | 25 |
| nazis             | 28 | 27 | 28 |
| links             | 28 | 27 | 25 |
| nerd              | 27 | 29 | 26 |
| born              | 27 | 29 | 27 |
| life              | 27 | 29 | 25 |
| #yestonocovid     | 27 | 29 | 27 |
| macht             | 26 | 33 | 26 |
| science           | 26 | 33 | 26 |
| like              | 26 | 33 | 24 |
| just              | 25 | 36 | 24 |
| meinung           | 25 | 36 | 25 |
| manchmal          | 24 | 38 | 24 |
| freiheit          | 24 | 38 | 21 |
| gibt              | 24 | 38 | 21 |
| music             | 24 | 38 | 23 |
| mitglied          | 24 | 38 | 24 |
| fan               | 24 | 38 | 24 |
| musik             | 23 | 44 | 23 |
| vater             | 23 | 44 | 23 |
| kinder            | 23 | 44 | 23 |
| geimpft           | 23 | 44 | 23 |
| mal               | 23 | 44 | 23 |
| art               | 23 | 44 | 23 |
| bitte             | 22 | 50 | 22 |
| #nazisraus        | 22 | 50 | 22 |
| health            | 22 | 50 | 18 |
| afd               | 22 | 50 | 22 |
| liebt             | 22 | 50 | 22 |
| software          | 22 | 50 | 22 |
| human             | 22 | 50 | 21 |
| people            | 21 | 57 | 20 |
| geht              | 21 | 57 | 19 |
| #nonazis          | 21 | 57 | 21 |
| world             | 20 | 60 | 20 |
| english           | 20 | 60 | 19 |
| frau              | 19 | 62 | 18 |
| herz              | 19 | 62 | 18 |
| rt                | 19 | 62 | 19 |
| irgendwas         | 19 | 62 | 19 |
| ppm               | 18 | 66 | 18 |
| #teamwissenschaft | 18 | 66 | 18 |
| loves             | 18 | 66 | 17 |
| twittert          | 17 | 69 | 17 |
| mom               | 17 | 69 | 17 |
| feminist          | 17 | 69 | 17 |
| vegan             | 17 | 69 | 17 |
| #pflege           | 17 | 69 | 16 |
| krankenschwester  | 17 | 69 | 17 |
| einfach           | 17 | 69 | 17 |

|                    |    |     |    |
|--------------------|----|-----|----|
| gerne              | 17 | 69  | 17 |
| student            | 17 | 69  | 17 |
| verheiratet        | 16 | 78  | 16 |
| politics           | 16 | 78  | 16 |
| mother             | 16 | 78  | 16 |
| natur              | 16 | 78  | 16 |
| nie                | 16 | 78  | 16 |
| go                 | 16 | 78  | 13 |
| #antifa            | 16 | 78  | 16 |
| #bildungabersicher | 16 | 78  | 16 |
| zeit               | 16 | 78  | 15 |
| stuff              | 16 | 78  | 16 |
| germany            | 16 | 78  | 16 |
| journalist         | 16 | 78  | 16 |
| queer              | 16 | 78  | 16 |
| de                 | 16 | 78  | 14 |
| jahre              | 16 | 78  | 15 |
| gern               | 16 | 78  | 16 |
| papa               | 15 | 94  | 15 |
| satire             | 15 | 94  | 15 |
| bücher             | 15 | 94  | 15 |
| can                | 15 | 94  | 13 |
| gesundheits-       | 15 | 94  | 15 |
| care               | 15 | 94  | 14 |
| impressum          | 15 | 94  | 15 |
| writer             | 15 | 94  | 15 |
| feminismus         | 15 | 94  | 15 |
| statt              | 15 | 94  | 15 |
| ja                 | 15 | 94  | 15 |
| gesellschaft       | 14 | 105 | 14 |
| things             | 14 | 105 | 13 |
| artist             | 14 | 105 | 14 |
| follow             | 14 | 105 | 14 |
| kaffee             | 14 | 105 | 13 |
| krankenpfleger     | 14 | 105 | 14 |
| #zerocovid         | 14 | 105 | 14 |
| #lebenretten       | 14 | 105 | 14 |
| schwurbler         | 14 | 105 | 14 |
| always             | 14 | 105 | 14 |
| kunst              | 14 | 105 | 14 |
| linksgrünversifft  | 13 | 116 | 13 |
| interested         | 13 | 116 | 12 |
| deutschland        | 13 | 116 | 13 |
| recht              | 13 | 116 | 13 |
| good               | 13 | 116 | 12 |
| beim               | 13 | 116 | 12 |
| grün               | 13 | 116 | 12 |
| oft                | 13 | 116 | 13 |
| seele              | 13 | 116 | 13 |
| private            | 13 | 116 | 13 |
| block              | 13 | 116 | 10 |

|                |    |     |    |
|----------------|----|-----|----|
| antifaschist   | 13 | 116 | 13 |
| gutmensch      | 13 | 116 | 13 |
| unterwegs      | 13 | 116 | 13 |
| zustimmung     | 13 | 116 | 13 |
| history        | 12 | 131 | 9  |
| pronomen       | 12 | 131 | 12 |
| geschichte     | 12 | 131 | 12 |
| gamer          | 12 | 131 | 12 |
| menschenrechte | 12 | 131 | 12 |
| dm             | 12 | 131 | 12 |
| geboren        | 12 | 131 | 12 |
| day            | 12 | 131 | 12 |
| gute           | 12 | 131 | 12 |
| sehen          | 12 | 131 | 11 |
| feministin     | 12 | 131 | 12 |
| 3x             | 12 | 131 | 12 |
| freie          | 12 | 131 | 11 |
| kindern        | 12 | 131 | 12 |
| trans          | 12 | 131 | 11 |
| autorin        | 12 | 131 | 12 |
| berlin         | 12 | 131 | 12 |
| schreiben      | 12 | 131 | 12 |
| hobby          | 12 | 131 | 12 |
| engineer       | 12 | 131 | 12 |

Anmerkungen: frequency bezieht sich auf die absolute Häufigkeit, docfreq zählt jeden Begriff pro Kurzbeschreibung nur einmal.

Quelle: Twitter-Daten, eigene Berechnungen.

## Kodes

Auf Grundlage der qualitativen Inhaltsanalyse konnten von uns vier induktive Hauptkodes hergeleitet werden: erstens Ressourcenmangel und prekäre Arbeitsbedingungen, zweitens die Einhaltung persönlicher Werte und beruflicher Ethik, drittens die Reziprozität zwischen Pflegenden und weiteren Personen (Pflegebedürftigen, Vorgesetzten, Kolleg:innen) sowie viertens eine kollektive Sprache finden/Kollektivität herstellen und Handlungsblockaden lösen. Eine vollständige Übersicht aller (Haupt- und Unter-)Kodes ist Tabelle A3 zu entnehmen.

Tabelle A3: Liste aller (Haupt- und Unter-)Kodes

| Hauptkodes                                             | Unterkodes                           |
|--------------------------------------------------------|--------------------------------------|
| <b>Ressourcenmangel und prekäre Arbeitsbedingungen</b> |                                      |
|                                                        | Zeitmangel                           |
|                                                        | Personalmangel                       |
|                                                        | Mangel in der Sachausstattung        |
|                                                        | Entgrenzte Arbeitszeiten             |
|                                                        | Absurdität von Ökonomisierung        |
|                                                        | Prekäre Arbeitsbedingungen aufdecken |



|                                                                                                                      |                                                                                                                 |
|----------------------------------------------------------------------------------------------------------------------|-----------------------------------------------------------------------------------------------------------------|
|                                                                                                                      | Wahren Grund herausfinden                                                                                       |
| <b><i>Einhaltung persönlicher Werte und beruflicher Ethik</i></b>                                                    |                                                                                                                 |
|                                                                                                                      | Ansprüche zu helfen und die Leistungsethik der medizinischen Berufe                                             |
|                                                                                                                      | Leistungswert ‚gute Pflege‘                                                                                     |
|                                                                                                                      | Kluft zwischen Handlung und Überzeugung                                                                         |
|                                                                                                                      | Persönliche Werte und Vorstellungen über würdevolles Sterben                                                    |
|                                                                                                                      | Kompetenzverletzungen                                                                                           |
|                                                                                                                      | Mehrfacherlebnis                                                                                                |
|                                                                                                                      | Pflexit                                                                                                         |
|                                                                                                                      | Moralische Verletzungen nicht erst seit der Coronapandemie                                                      |
|                                                                                                                      | Moralische Verletzungen auch in anderen Care-Bereichen                                                          |
|                                                                                                                      | Moralische Verletzung durch die ungleiche Aufteilung von Care-Arbeit, Gleichheit als Gerechtigkeitsorientierung |
| <b><i>Reziprozität zwischen Pflegenden und weiteren Personen (Pflegebedürftigen, Vorgesetzten, Kolleg:innen)</i></b> |                                                                                                                 |
|                                                                                                                      | Reziprozitätsbeziehungen zwischen Pflegenden und zu Pflegenden                                                  |
|                                                                                                                      | Gewaltanwendung oder Gewalterfahrung                                                                            |
|                                                                                                                      | Erfüllung von Vorgaben, die der beruflichen Ethik widersprechen                                                 |
|                                                                                                                      | Verantwortung auf andere Personen verlagern                                                                     |
|                                                                                                                      | Bevorzugung der „Zahlenden“                                                                                     |
|                                                                                                                      | Genderhierarchien                                                                                               |
|                                                                                                                      | Verletzung der eigenen Würde durch sexuelle Belästigung                                                         |
| <b><i>Eine kollektive Sprache finden/Kollektivität herstellen und gemeinsam Handlungsblockaden lösen</i></b>         |                                                                                                                 |
|                                                                                                                      | Eine gemeinsame kollektive Sprache                                                                              |
|                                                                                                                      | Sprechen über (kollektive) Gefühle ermöglichen                                                                  |
|                                                                                                                      | Angst vor Erinnerung an moralische Verletzungen                                                                 |
|                                                                                                                      | Logik der individuellen Schuldzuweisung wird thematisiert und abgewehrt                                         |
|                                                                                                                      | Twitter als Medium zur Bewältigung moralischer Verletzungen/kollektive Bewältigungsstrategie                    |
|                                                                                                                      | Fehlende Interessenvertretung                                                                                   |
|                                                                                                                      | Aufruf sich zu organisieren und Aufruf zum kollektiven Handeln                                                  |
|                                                                                                                      | Zurückweisung des „Held:innen“-Bildes                                                                           |
|                                                                                                                      | Folgen: Emotionen wie Schuld- und Schamgefühle, Trauer, Wut und Verzweiflung                                    |
|                                                                                                                      | Folgen: Trauma, Erschöpfung, körperliche Schmerzen, mental load, trotz Krankheitssymptomen (weiter-)gearbeitet  |
|                                                                                                                      | „Abstumpfen“ der Pflegekräfte                                                                                   |
|                                                                                                                      | Wenn reden überfordert und moralische Verletzungen mit nach Hause genommen/verdrängt werden                     |
|                                                                                                                      | Fehlende, unzureichende oder nicht angemessene Supervision                                                      |
|                                                                                                                      | Lösungsstrategie moralischer Verletzungen: Skandalisierung                                                      |

Quelle: Twitter-Daten, eigene Darstellungen.

## Literatur

Barrie, C. & Ho, J. C., 2021: AcademictwitterR: An R Package to Access the Twitter Academic Research Product Track V2 API Endpoint. *Journal of Open Source Software*, 6(62): 3272.

Benoit, K., Watanabe, K., Wang, H., Nulty, P., Obeng, A., Müller, S. & Matsuo, A., 2018: Quanteda: An R Package for the Quantitative Analysis of Textual Data. *Journal of Open Source Software*, 3(30): 774.

Grimmer, J., Roberts, M. E. & Stewart, B. M., 2022: *Text as data: A New Framework for Machine Learning and the Social Sciences*. Princeton: Princeton University Press.

Mayerl, J. & Faas, T., 2022: Quantitative Analyse von Twitter und anderer usergenerierter Kommunikation. S. 1321–1335 in: N. Baur & J. Blasius (Hrsg.), *Handbuch Methoden der empirischen Sozialforschung*. Wiesbaden: Springer.

O'Connor, C. & Joffe, H., 2020: Intercoder Reliability in Qualitative Research: Debates and Practical Guidelines. *International Journal of Qualitative Methods*, 19, 1609406919899220.

Pfaffenberger, F. 2018: What You Tweet is What We Get? About the Scientific Use of Twitter Data. *Publizistik*, 63: 53–72.

Shugars, S., Gitomer, A., McCabe, S., Gallagher, R. J., Joseph, K., Grinberg, N., Doroshenko, L., Welles, B. F. & Lazer, D., 2021: Pandemics, Protests, and Publics: Demographic Activity and Engagement on Twitter in 2020. *Journal of Quantitative Description: Digital Media*, 1.
